# Supplementary material for: Nanovoid-driven highly crystalline aluminum nitride and its application in solar-blind UV photodetectors
Source: Royal Society of Chemistry journal article supplement (doi:10.1039/d0tc03208e), 2020-01-01
Supplement: d0tc03208e1.pdf [file d0tc03208e1.pdf]

## Supplementary information

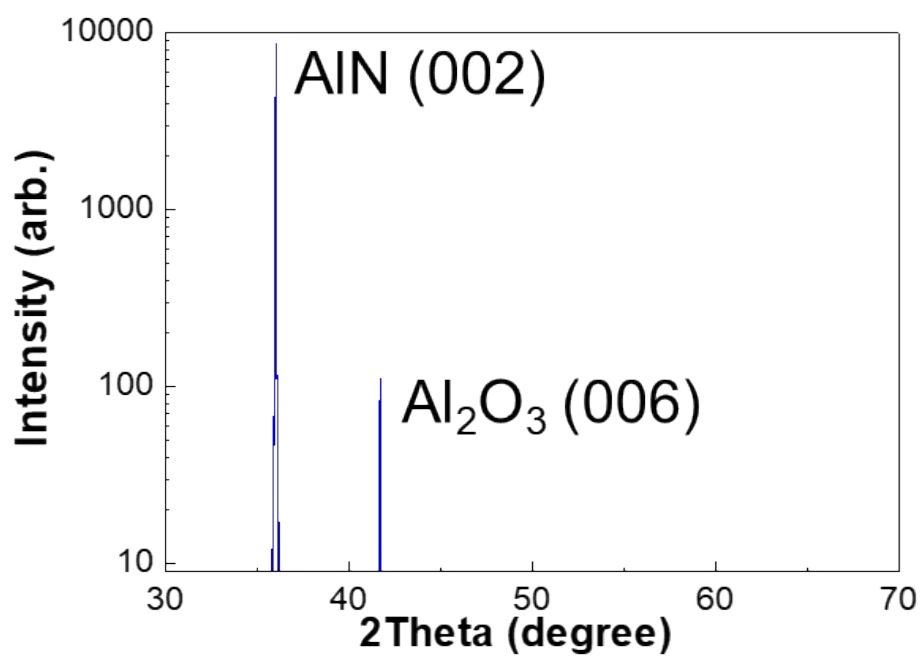

**Fig. S1.** X-ray diffraction of as-dep AlN template by HVPE.

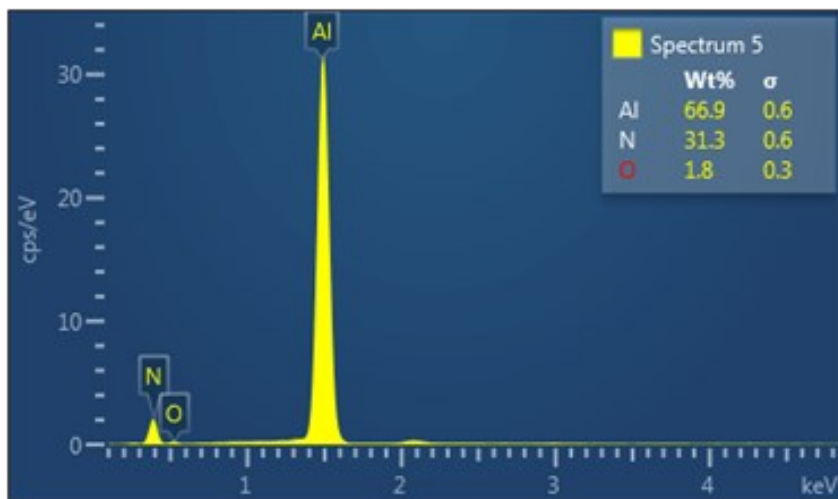

| Element | Line Type | Apparent Concentration | k Ratio | Wt%    | Wt% Sigma | Atomic % | Standard Label | Factory Standard | Standard Calibration Date |
|---------|-----------|------------------------|---------|--------|-----------|----------|----------------|------------------|---------------------------|
| N       | K series  | 57.40                  | 0.10219 | 31.32  | 0.62      | 46.32    | BN             | Yes              |                           |
| O       | K series  | 1.36                   | 0.00459 | 1.80   | 0.26      | 2.33     | SiO2           | Yes              |                           |
| Al      | K series  | 109.14                 | 0.78389 | 66.89  | 0.63      | 51.35    | Al2O3          | Yes              |                           |
| Total:  |           |                        |         | 100.00 |           | 100.00   |                |                  |                           |

**Fig. S2.** EDS analysis of AlN layers after surface treatment for 3 min.

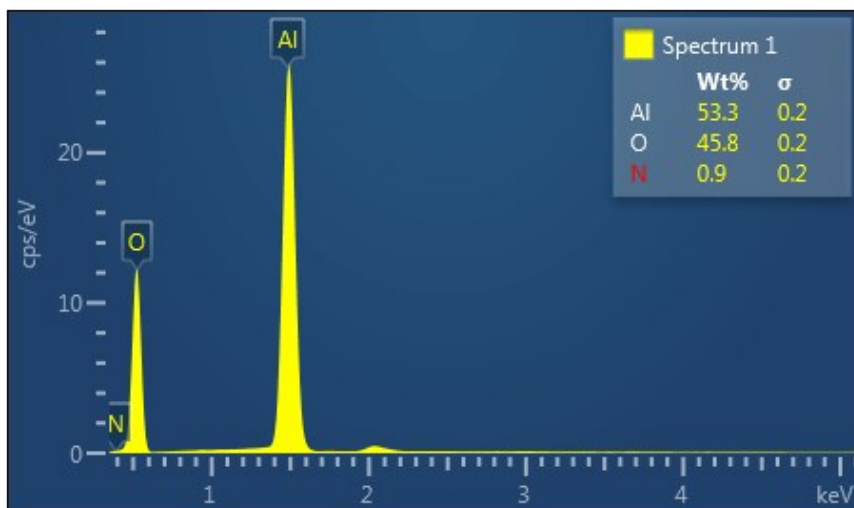

| Element | Line Type | Apparent Concentration | k Ratio | Wt%    | Wt% Sigma | Atomic % | Standard Label | Factory Standard | Standard Calibration Date |
|---------|-----------|------------------------|---------|--------|-----------|----------|----------------|------------------|---------------------------|
| N       | K series  | 2.18                   | 0.00388 | 0.94   | 0.22      | 1.37     | BN             | Yes              |                           |
| O       | K series  | 91.38                  | 0.30752 | 45.76  | 0.24      | 58.34    | SiO2           | Yes              |                           |
| Al      | K series  | 85.00                  | 0.61048 | 53.30  | 0.24      | 40.29    | Al2O3          | Yes              |                           |
| Total:  |           |                        |         | 100.00 |           | 100.00   |                |                  |                           |

**Fig. S3.** EDS analysis of AlN layers after surface treatment for 10 min.
